# Supplementary material for: Twisted tale of the tiger: the case of inappropriate data and deficient science
Source: PeerJ. 2019 Aug 20;7:e7482. doi: 10.7717/peerj.7482 (PMC6707339; doi:10.7717/peerj.7482)
Supplement: Supplemental Information 1 [file peerj-07-7482-s001.xlsx]

## Sheet: Table 9 & 15
Source: Karanth, K.U. & Kumar, N.S. (2005) Distribution and Dynamics of Tiger and Prey Populations in Maharashtra, India, Final Technical Report. Centre for Wildlife Studies, Bangalore.
Table 9. Results of the camera traps surveys in Melghat Tiger Reserve
March-June 2002
Total number of camera trap locations	60
Sampling effort	896 trap nights
Number of sampling occasions	15
Camera trap polygon area	203 km2
Estimate sampled area including buffer	360 km2
Number of individually identified tigers	15
Capture-recapture model used to estimate population size	Mh
Estimated animal density for tigers in the sampled area	6.7 tigers/100km2
Source: Karanth, K.U. & Kumar, N.S. (2005) Distribution and Dynamics of Tiger and Prey Populations in Maharashtra, India, Final Technical Report. Centre for Wildlife Studies, Bangalore
Table 15. Results of the camera trap surveys in Pench Tiger Reserve
November-December 2002
Total number of camera trap locations	60
Sampling effort	715 trap nights
Number of sampling occasions	12
Camera trap polygon area	112 km2
Estimate sampled area including buffer	270 km2
Number of individually identified tigers	14
Capture-recapture model used to estimate population size	Mh
Estimated animal density for tigers in the sampled area	7.3 tigers/100km2

## Sheet: Table 21
Table 21. Number of scats encountered and estimated scat encounter rates in Tadoba-Andhari, Melghat and Pench Tiger Reserves
	Tadoba-Andhari 2003		Melghat 2005		Pench 2004
Effort (km)		286.4		326		233.2
Species	No.	Encounter rate (scats/10km)	No.	Encounter rate (scats/10km)	No.	Encounter rate (scats/10km)
Tiger	57	1.99	55	2.36	56	2.4
Leopard	61	2.13	171	7.35	35	1.5
Dhole	6	0.21	64	2.75	14	0.6

## Sheet: Table 2
Source: Andheria, A.P. (2006) Assessment of diet and abundance of large carnivores from field surveys of scats. Master’s thesis, Manipal University
Table 2: Number of tiger scats encountered and resulting estimates of relative tiger abundance derived from a 35 day field survey covering 1117 km distance in which routes were sampled once every seven days.
	Sampling route	Length (Km)	No. of scats encountered per each sampling period						Index of scat encounter rate (scats/10 km2)
	ID		1	2	3	4	5	Total	X, (SE)
	1	16	2	2	3	1	1	9	1.13 (0.23)
	2	13.6	3	6	0	4	2	15	2.21 (0.74)
	3	15	2	3	4	0	0	9	1.20 (0.53)
	4	14.5	0	4	2	4	0	10	1.38 (0.62)
	5	16.8	4	0	1	1	1	7	0.83 (0.40)
	6	14	10	5	3	4	3	25	3.57 (0.93)
	7	10.5	2	1	4	1	0	8	1.52 (0.65)
	8	12.1	0	6	5	5	3	19	3.14 (0.88)
	9	10	1	4	0	0	2	7	1.40 (0.75)
	10	10.6	1	3	1	1	1	7	1.32 (0.38)
	11	16.1	5	4	3	5	8	25	3.11 (0.52)
	12	15.2	2	6	6	7	2	23	3.03 (0.71)
	13	15.1	2	0	3	2	1	8	1.06 (0.34)
	14	8.8	6	3	5	3	2	19	4.32 (0.84)
	15	12.5	3	3	2	5	1	14	2.24 (0.53)
	16	13.8	1	3	2	1	1	8	1.16 (0.29)
	17	10.5	1	4	4	3	1	13	2.48 (0.65)
	18	10.3	3	5	4	3	1	16	3.11 (0.64)
	Mean encounter rate of tiger scat per 10 km = 2.12 (SE=0.25)

## Sheet: SourceData&Fig5-Gopalaswamy2015
Site	Scat_from_source_references cited in Goplalaswamy et al 2015	Scat_from_figure5 of Gopalaswamy et al 2015	Density_from_figure5 of Gopalaswamy et al 2015	Tiger_Density_frpm Karanth et al. PNAS_2004
Bandipur	2.1284	2.1284	11.9679	11.97
Kanha	2.61	2.6178	11.6993	11.7
Kaziranga	2.64	2.6533	16.7572	16.76
Melghat	2.36	1.7048	6.7046	6.67
Nagarahole	1.17	1.1733	11.9085	11.92
Pench-MP	0.67	0.6657	4.9633	4.94
Pench-MR	2.4	2.2938	7.3044	7.29
Tadoba	1.99	3.6341	3.3252	3.27
